# Supplementary material for: The Intraperitoneal Transcriptome of the Opportunistic Pathogen Enterococcus faecalis in Mice
Source: PubMed Central journal article supplement (PMC4433114; doi:10.1371/journal.pone.0126143), 2015-05-15
Supplement: pone.0126143.s002.pdf [file pone.0126143.s002.pdf]

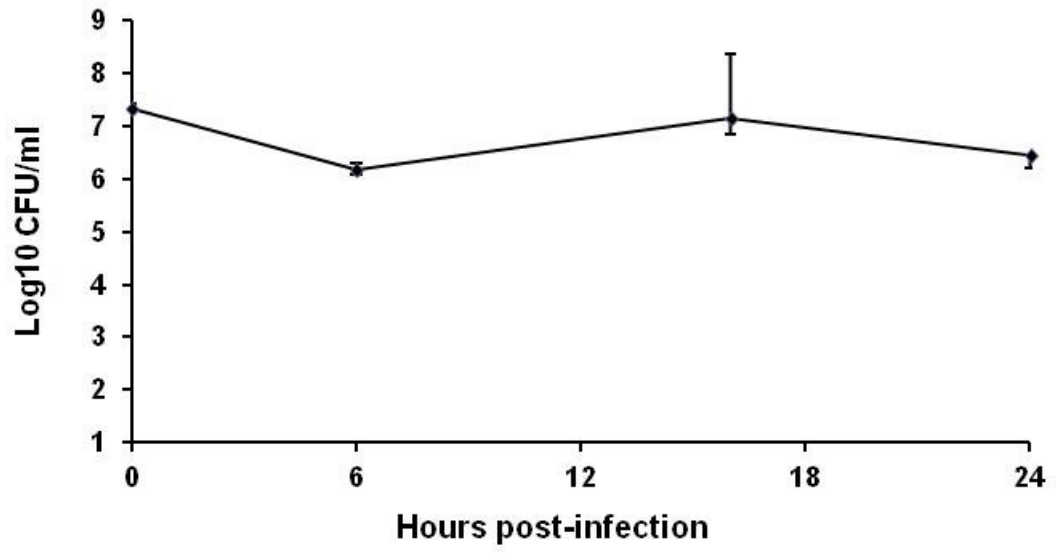

**Figure S2**
